# Supplementary material for: Gammaherpesviral Gene Expression and Virion Composition Are Broadly Controlled by Accelerated mRNA Degradation
Source: PubMed Central journal article supplement (PMC3894220; doi:10.1371/journal.ppat.1003882), 2014-01-16

**A**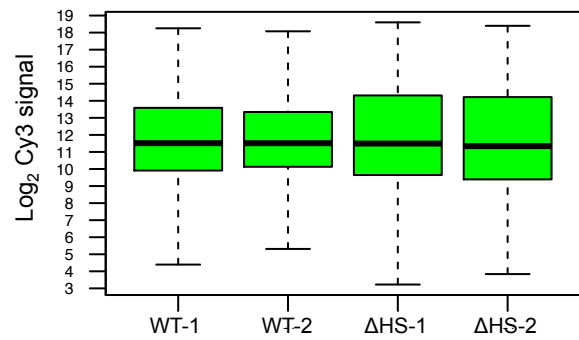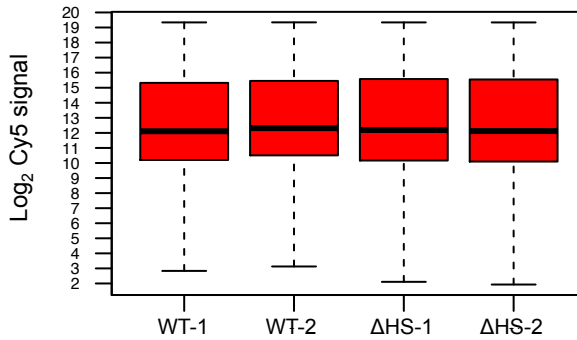**B**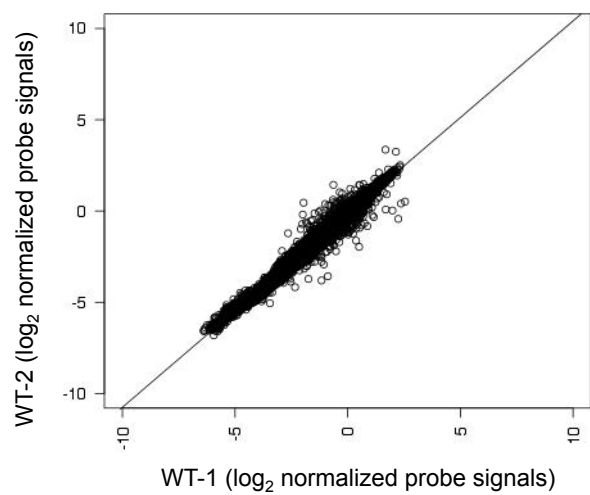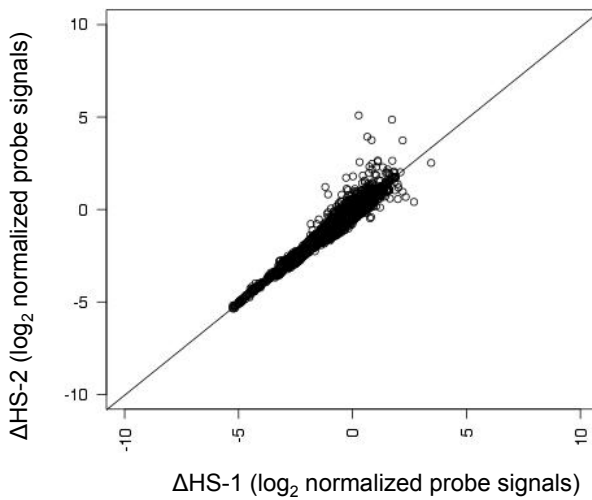

Supplement: ppat.1003882.s001.pdf [file ppat.1003882.s001.pdf]
